# Supplementary material for: A Novel Epigenetic Silencing Pathway Involving the Highly Conserved 5’-3’ Exoribonuclease Dhp1/Rat1/Xrn2 in Schizosaccharomyces pombe
Source: PubMed Central journal article supplement (PMC4758730; doi:10.1371/journal.pgen.1005873), 2016-02-18
Supplement: pgen.1005873.s001.pdf [file pgen.1005873.s001.pdf]

S1 Table: List of strains used in this study (1 of 3)

| Strains    | <i>mat</i>        | <i>leu1</i>    | <i>ade6</i>           | <i>his2</i>      | <i>ura4</i>                                       | Epigenetic Reporter            | Mutation                            |
|------------|-------------------|----------------|-----------------------|------------------|---------------------------------------------------|--------------------------------|-------------------------------------|
| SPKZ8      | <i>Mat1 Msmt0</i> | <i>leu1-32</i> | <i>ade6-216</i>       | <i>his2</i>      | <i>ura4 DS/E</i>                                  | <i>otr1R(Sph1)::ura4+</i>      | -                                   |
| SPFY648    | <i>h+</i>         | <i>leu1-32</i> | <i>ade6-210</i>       | <i>his2</i>      | <i>ura4 DS/E</i>                                  | <i>otr1R(Sph1)::ura4+</i>      | -                                   |
| SPWF48     | <i>Mat1 Msmt0</i> | <i>leu1-32</i> | <i>ade6 DN/N plus</i> | <i>ura4 DS/E</i> | <i>otr1R(Sph1)::ura4+</i> ,<br><i>mat2::ade6+</i> | -                              |                                     |
| SPKZ91a    | <i>Mat1 Msmt0</i> | <i>leu1+</i>   | <i>ade6 DN/N plus</i> | <i>ura4 DS/E</i> | <i>otr1R(Sph1)::ura4+</i> ,<br><i>mat2::ade6+</i> | -                              |                                     |
| SPAP259    | <i>Mat1 Msmt0</i> | <i>leu1-32</i> | <i>ade6-210 plus</i>  | -                | <i>ura4::[CenH3.6KB+ade6+]</i>                    | -                              |                                     |
| P20        | <i>h+</i>         | <i>leu1-32</i> | <i>ade6-216 plus</i>  | <i>ura4 DS/E</i> | <i>otr1R(Sph1)::ura4+</i>                         | -                              |                                     |
| P1413      | <i>Mat1 Msmt0</i> | <i>leu1-32</i> | <i>ade6+</i>          | <i>plus</i>      | <i>ura4-D18</i>                                   | -                              | <i>rpb2-flag-HTpA</i>               |
| SPJT174(D) | <i>Mat1 Msmt0</i> | <i>leu1-32</i> | <i>ade6 DN/N</i>      | <i>his2</i>      | -                                                 | <i>kΔ::ade6+ (off)</i>         | -                                   |
| SPWF28     | <i>Mat1 Msmt0</i> | <i>leu1-32</i> | <i>ade6-210</i>       | <i>his2</i>      | <i>ura4 DS/E</i>                                  | <i>otr1R(Sph1)::ura4+</i>      | <i>dhp1-1</i>                       |
| SPJT42     | <i>Mat1 Msmt0</i> | <i>leu1-32</i> | <i>ade6-216</i>       | <i>his2</i>      | <i>ura4 DS/E</i>                                  | <i>otr1R(Sph1)::ura4+</i>      | <i>dhp1-2</i>                       |
| SPKR1      | <i>Mat1 Msmt0</i> | <i>leu1-32</i> | <i>ade6 DN/N plus</i> | <i>ura4 DS/E</i> | <i>otr1R(Sph1)::ura4+</i> ,<br><i>mat2::ade6+</i> | <i>dhp1-1</i>                  |                                     |
| SPJT191    | <i>Mat1 Msmt0</i> | <i>leu1-32</i> | <i>ade6-210 plus</i>  | -                | <i>ura4::[CenH3.6KB+ade6+]</i>                    | <i>dhp1-1</i>                  |                                     |
| SPJT186a   | <i>Mat1 Msmt0</i> | <i>leu1-32</i> | <i>ade6-210</i>       | <i>his2</i>      | -                                                 | <i>kΔ::ade6+ (off)</i>         | <i>dhp1-1</i>                       |
| P1088      | <i>Mat1 Msmt0</i> | <i>leu1-32</i> | <i>ade6 DN/N plus</i> | <i>ura4 DS/E</i> | <i>otr1R(Sph1)::ura4+</i> ,<br><i>mat2::ade6+</i> | <i>dhp1-1</i>                  |                                     |
| P1496      | <i>h+</i>         | <i>leu1-32</i> | <i>ade6+</i>          | <i>plus</i>      | <i>ura4-D18</i>                                   | -                              | <i>dhp1-1, rpb2-flag-HTpA</i>       |
| SPJT9      | <i>h+</i>         | <i>leu1-32</i> | <i>ade6-210 plus</i>  | <i>ura4 DS/E</i> | <i>otr1R(Sph1)::ura4+</i>                         | <i>dhp1-FTP::NATN2</i>         |                                     |
| SPWB6      | <i>Mat1 Msmt0</i> | <i>leu1-32</i> | <i>ade6-216</i>       | <i>his2</i>      | <i>ura4 DS/E</i>                                  | <i>otr1R(Sph1)::ura4+</i>      | <i>din1Δ::kanMX</i>                 |
| SPWF39a    | <i>Mat1 Msmt0</i> | <i>leu1+</i>   | <i>ade6 DN/N plus</i> | <i>ura4 DS/E</i> | <i>otr1R(Sph1)::ura4+</i> ,<br><i>mat2::ade6+</i> | <i>din1Δ::kanMX</i>            |                                     |
| SPJT240    | <i>Mat1 Msmt0</i> | <i>leu1-32</i> | <i>ade6 DN/N plus</i> | <i>ura4 DS/E</i> | <i>otr1R(Sph1)::ura4+</i> ,<br><i>mat2::ade6+</i> | <i>din1Δ::kanMX</i>            |                                     |
| p1040      | <i>h+</i>         | <i>leu1-32</i> | <i>ade6-210/216</i>   | <i>plus</i>      | <i>ura4-D18</i>                                   | -                              | <i>din1Δ::kanMX, rpb2-flag-HTpA</i> |
| SPWB9      | <i>Mat1 Msmt0</i> | <i>leu1-32</i> | <i>ade6-216</i>       | <i>his2</i>      | <i>ura4 DS/E</i>                                  | <i>otr1R(Sph1)::ura4+</i>      | <i>din1-FTP::NATN2</i>              |
| SPJT23     | <i>Mat1 Msmt0</i> | <i>leu1-32</i> | <i>ade6-216</i>       | <i>his2</i>      | <i>ura4 DS/E</i>                                  | <i>otr1R(Sph1)::ura4+</i>      | <i>ago1Δ::kanMX</i>                 |
| SPJT193a   | <i>Mat1 Msmt0</i> | <i>leu1-32</i> | <i>ade6-216</i>       | <i>his2</i>      | -                                                 | <i>ura4::[CenH3.6KB+ade6+]</i> | <i>ago1Δ::kanMX</i>                 |
| SPJT249a   | <i>Mat1 Msmt0</i> | <i>leu1-32</i> | <i>ade6 DN/N plus</i> | <i>ura4 DS/E</i> | <i>otr1R(Sph1)::ura4+</i> ,<br><i>mat2::ade6+</i> | <i>ago1Δ::kanMX</i>            |                                     |
| SPJT132    | <i>Mat1 Msmt0</i> | <i>leu1-32</i> | <i>ade6-210</i>       | <i>his2</i>      | <i>ura4 DS/E</i>                                  | <i>otr1R(Sph1)::ura4+</i>      | <i>ago1Δ::kanMX, dhp1-1</i>         |
| SPJT242a   | <i>Mat1 Msmt0</i> | <i>leu1-32</i> | <i>ade6 DN/N plus</i> | <i>ura4 DS/E</i> | <i>otr1R(Sph1)::ura4+</i> ,<br><i>mat2::ade6+</i> | <i>ago1Δ::kanMX, dhp1-1</i>    |                                     |
| SPJT213a   | <i>Mat1 Msmt0</i> | <i>leu1-32</i> | <i>ade6-216</i>       | <i>his2</i>      | <i>ura4 DS/E</i>                                  | <i>otr1R(Sph1)::ura4+</i>      | <i>ago1Δ::kanMX, rrp6Δ::kanMX</i>   |
| SPKZ364    | <i>Mat1 Msmt0</i> | <i>leu1-32</i> | <i>ade6-210</i>       | <i>his2</i>      | <i>ura4 DS/E</i>                                  | <i>otr1R(Sph1)::ura4+</i>      | <i>clr3Δ::kanMX</i>                 |

S1 Table: List of strains used in this study (2 of 3)

| Strains  | <i>mat</i>        | <i>leu1</i>    | <i>ade6</i>      | <i>his2</i> | <i>ura4</i>      | Epigenetic Reporter                    | Mutation                                         |
|----------|-------------------|----------------|------------------|-------------|------------------|----------------------------------------|--------------------------------------------------|
| SPJT122  | <i>Mat1 Msmt0</i> | <i>leu1-32</i> | <i>ade6-210</i>  | <i>his2</i> | <i>ura4 DS/E</i> | <i>otr1R(Sph1)::ura4+</i>              | <i>clr3Δ::kanMX, dhp1-1</i>                      |
| SPKZ569  | <i>Mat1 Msmt0</i> | <i>leu1-32</i> | <i>ade6-210</i>  | <i>plus</i> | <i>ura4 DS/E</i> | <i>otr1R(Sph1)::ura4+</i>              | <i>clr4Δ::kanMX</i>                              |
| SPJT97   | <i>Mat1 Msmt0</i> | <i>leu1-32</i> | <i>ade6 DN/N</i> | <i>plus</i> | <i>ura4 DS/E</i> | <i>otr1R(Sph1)::ura4+, mat2::ade6+</i> | <i>clr4Δ::kanMX</i>                              |
| SPJT123a | <i>Mat1 Msmt0</i> | <i>leu1-32</i> | <i>ade6-210</i>  | <i>his2</i> | <i>ura4 DS/E</i> | <i>otr1R(Sph1)::ura4+</i>              | <i>clr4Δ::kanMX, dhp1-1</i>                      |
| SPJT239a | <i>Mat1 Msmt0</i> | <i>leu1-32</i> | <i>ade6-216</i>  | <i>his2</i> | <i>ura4 DS/E</i> | <i>otr1R(Sph1)::ura4+</i>              | <i>clr4Δ::kanMX, dcr1Δ::kanMX</i>                |
| SPJT225  | <i>Mat1 Msmt0</i> | <i>leu1-32</i> | <i>ade6-210</i>  | <i>his2</i> | <i>ura4 DS/E</i> | <i>otr1R(Sph1)::ura4+</i>              | <i>clr4Δ::kanMX, dcr1Δ::kanMX, dhp1-1</i>        |
| SPJT119a | <i>Mat1 Msmt0</i> | <i>leu1+</i>   | <i>ade6-210</i>  | <i>his2</i> | <i>ura4 DS/E</i> | <i>otr1R(Sph1)::ura4+</i>              | <i>clr4Δ::kanMX, clr4+</i>                       |
| SPJT133a | <i>Mat1 Msmt0</i> | <i>leu1+</i>   | <i>ade6-210</i>  | <i>his2</i> | <i>ura4 DS/E</i> | <i>otr1R(Sph1)::ura4+</i>              | <i>clr4Δ::kanMX, clr4+, dhp1-1</i>               |
| SPJT251a | <i>Mat1 Msmt0</i> | <i>leu1+</i>   | <i>ade6-216</i>  | <i>his2</i> | <i>ura4 DS/E</i> | <i>otr1R(Sph1)::ura4+</i>              | <i>clr4Δ::kanMX, clr4+, dcr1Δ::kanMX</i>         |
| p1495    | <i>h+</i>         | <i>leu1-32</i> | <i>ade6+</i>     | <i>plus</i> | <i>ura4 DS/E</i> | <i>otr1R(Sph1)::ura4+</i>              | <i>clr4Δ::kanMX, rpb2-flag-HTpA</i>              |
| SPJT231a | <i>Mat1 Msmt0</i> | <i>leu1+</i>   | <i>ade6-210</i>  | <i>his2</i> | <i>ura4 DS/E</i> | <i>otr1R(Sph1)::ura4+</i>              | <i>clr4Δ::kanMX, clr4+, dcr1Δ::kanMX, dhp1-1</i> |
| SPHC272  | <i>Mat1 Msmt0</i> | <i>leu1-32</i> | <i>ade6-216</i>  | <i>his2</i> | <i>ura4 DS/E</i> | <i>otr1R(Sph1)::ura4+</i>              | <i>dcr1Δ::kanMX</i>                              |
| SPWF1    | <i>Mat1 Msmt0</i> | <i>leu1-32</i> | <i>ade6-210</i>  | <i>his2</i> | <i>ura4 DS/E</i> | <i>otr1R(Sph1)::ura4+</i>              | <i>dcr1Δ::kanMX, dhp1-1</i>                      |
| SPWF33   | <i>Mat1 Msmt0</i> | <i>leu1-32</i> | <i>ade6-210</i>  | <i>his2</i> | <i>ura4 DS/E</i> | <i>otr1R(Sph1)::ura4+</i>              | <i>epe1Δ::kanMX</i>                              |
| SPJT44   | <i>Mat1 Msmt0</i> | <i>leu1-32</i> | <i>ade6-216</i>  | <i>his2</i> | <i>ura4 DS/E</i> | <i>otr1R(Sph1)::ura4+</i>              | <i>dhp1-1, epe1Δ::kanMX</i>                      |
| SPJT166a | <i>Mat1 Msmt0</i> | <i>leu1-32</i> | <i>ade6-210</i>  | <i>his2</i> | <i>ura4-D18</i>  | <i>otr1R(Sph1)::ade6+</i>              | <i>rhn1Δ::kanMX</i>                              |
| SPJT167a | <i>Mat1 Msmt0</i> | <i>leu1-32</i> | <i>ade6-210</i>  | <i>his2</i> | <i>ura4 DS/E</i> | <i>otr1R(Sph1)::ura4+</i>              | <i>dhp1-1, rhn1Δ::kanMX</i>                      |
| SPKZ1153 | <i>Mat1 Msmt0</i> | <i>leu1-32</i> | <i>ade6-216</i>  | <i>his2</i> | <i>ura4 DS/E</i> | <i>otr1R(Sph1)::ura4+</i>              | <i>rrp6Δ::kanMX</i>                              |
| SPJT169b | <i>Mat1 Msmt0</i> | <i>leu1-32</i> | <i>ade6-210</i>  | <i>his2</i> | <i>ura4 DS/E</i> | <i>otr1R(Sph1)::ura4+</i>              | <i>dhp1-1, rrp6Δ::kanMX</i>                      |
| SPKZ841  | <i>Mat1 Msmt0</i> | <i>leu1-32</i> | <i>ade6-210</i>  | <i>his2</i> | <i>ura4 DS/E</i> | <i>otr1R(Sph1)::ura4+</i>              | <i>rpb2-m203</i>                                 |
| SPCY6a   | <i>Mat1 Msmt0</i> | <i>leu1-32</i> | <i>ade6-210</i>  | <i>his2</i> | <i>ura4 DS/E</i> | <i>otr1R(Sph1)::ura4+</i>              | <i>dhp1-1, rpb2-m203</i>                         |
| SPJT72   | <i>Mat1 Msmt0</i> | <i>leu1-32</i> | <i>ade6-216</i>  | <i>his2</i> | <i>ura4-D18</i>  | <i>otr1R(Sph1)::ura4+</i>              | <i>sir2Δ::kanMX</i>                              |
| SPJT138  | <i>Mat1 Msmt0</i> | <i>leu1-32</i> | <i>ade6 DN/N</i> | <i>his2</i> | <i>ura4 DS/E</i> | <i>otr1R(Sph1)::ura4+</i>              | <i>dhp1-1, sir2Δ::kanMX</i>                      |
| SPKZ392  | <i>Mat1 Msmt0</i> | <i>leu1-32</i> | <i>ade6-210</i>  | <i>his2</i> | <i>ura4 DS/E</i> | <i>otr1R(Sph1)::ura4+</i>              | <i>swi6Δ::NatN2</i>                              |
| SPJT164b | <i>Mat1 Msmt0</i> | <i>leu1-32</i> | <i>ade6-210</i>  | <i>his2</i> | <i>ura4 DS/E</i> | <i>kΔ::ade6+ (off)</i>                 | <i>swi6Δ::NatN2</i>                              |

S1 Table: List of strains used in this study (3 of 3)

| Strains  | <i>mat</i>        | <i>leu1</i>    | <i>ade6</i>           | <i>his2</i> | <i>ura4</i>      | Epigenetic Reporter                    | Mutation                             |
|----------|-------------------|----------------|-----------------------|-------------|------------------|----------------------------------------|--------------------------------------|
| SPT783   | <i>Mat1 Msmt0</i> | <i>leu1-32</i> | <i>ade6-216</i>       | <i>his2</i> | <i>ura4 DS/E</i> | <i>otr1R(Sph1)::ura4+</i>              | <i>mit1-myc::kanMX</i>               |
| SPJT274a | <i>Mat1 Msmt0</i> | <i>leu1-32</i> | <i>ade6-210</i>       | <i>his2</i> | <i>ura4 DS/E</i> | <i>otr1R(Sph1)::ura4+</i>              | <i>mit1-myc::kanMX, dhp1-1</i>       |
| SPJT276  | <i>Mat1 Msmt0</i> | <i>leu1-32</i> | <i>ade6-216</i>       | <i>his2</i> | <i>ura4 DS/E</i> | <i>otr1R(Sph1)::ura4+</i>              | <i>mit1-myc::kanMX, din1Δ::kanMX</i> |
| SPJT278a | <i>Mat1 Msmt0</i> | <i>leu1-32</i> | <i>ade6-216</i>       | <i>his2</i> | <i>ura4 DS/E</i> | <i>otr1R(Sph1)::ura4+</i>              | <i>mit1-myc::kanMX, clr4Δ::kanMX</i> |
| SPJT292a | <i>Mat1Msmt0</i>  | <i>leu1-32</i> | <i>ade6-DN/N plus</i> |             | <i>ura4 DS/E</i> | <i>otr1R(Sph1)::ura4+, mat2::ade6+</i> | + <i>pREP41 (vector)</i>             |
| SPJT288a | <i>Mat1Msmt0</i>  | <i>leu1-32</i> | <i>ade6-DN/N plus</i> |             | <i>ura4 DS/E</i> | <i>otr1R(Sph1)::ura4+, mat2::ade6+</i> | <i>dhp1-1 + pREP41 (vector)</i>      |
| SPJT293  | <i>Mat1Msmt0</i>  | <i>leu1-32</i> | <i>ade6-DN/N plus</i> |             | <i>ura4 DS/E</i> | <i>otr1R(Sph1)::ura4+, mat2::ade6+</i> | + <i>pdhp1+</i>                      |
| SPWF76a  | <i>Mat1 Msmt0</i> | <i>leu1-32</i> | <i>ade6-210</i>       | <i>his2</i> | <i>ura4 DS/E</i> | <i>otr1R(Sph1)::ura4+</i>              | <i>dhp1-1 + pdhp1+</i>               |
| SPJT301a | <i>Mat1Msmt0</i>  | <i>leu1-32</i> | <i>ade6-DN/N plus</i> |             | <i>ura4 DS/E</i> | <i>otr1R(Sph1)::ura4+, mat2::ade6+</i> | + <i>pdhp1-D55A E207Q</i>            |
| SPJT303a | <i>Mat1Msmt0</i>  | <i>leu1-32</i> | <i>ade6-DN/N plus</i> |             | <i>ura4 DS/E</i> | <i>otr1R(Sph1)::ura4+, mat2::ade6+</i> | <i>dhp1-1 + pdhp1-D55A E207Q</i>     |
