# Supplementary material for: A Novel Epigenetic Silencing Pathway Involving the Highly Conserved 5’-3’ Exoribonuclease Dhp1/Rat1/Xrn2 in Schizosaccharomyces pombe
Source: PubMed Central journal article supplement (PMC4758730; doi:10.1371/journal.pgen.1005873), 2016-02-18
Supplement: pgen.1005873.s002.pdf [file pgen.1005873.s002.pdf]

S2 Table: Relative Expression of Silencing Factors\*

|                    | dhp1-1/WT   | din1Δ/WT    |
|--------------------|-------------|-------------|
| <i>swi6</i>        | 0.854685647 | 1.136978862 |
| <i>chp2</i>        | 0.98005497  | 1.321010606 |
| <i>clr4</i>        | 0.968112804 | 0.966577954 |
| <i>rik1</i>        | 0.947395296 | 1.155050305 |
| <i>stc1</i>        | 1           | 1.183624876 |
| <i>pcu4 (cul4)</i> | 1           | 1.122932913 |
| <i>raf1 (dos1)</i> | 0.957442401 | 1.404922713 |
| <i>raf2 (dos2)</i> | 0.99886828  | 1.121689036 |
| <i>clr1</i>        | 0.970989556 | 1.044235404 |
| <i>clr2</i>        | 0.564879803 | 0.907492358 |
| <i>clr3</i>        | 0.758853321 | 0.938691001 |
| <i>mit1</i>        | 0.96593702  | 1.077740887 |
| <i>ccq1</i>        | 0.952139665 | 1.029906927 |
| <i>taz1</i>        | 1.085419344 | 1.128192968 |
| <i>epe1</i>        | 1           | 0.864043559 |
| <i>sir2</i>        | 1.051220944 | 1.146409381 |
| <i>cdc20</i>       | 0.987164085 | 1.157919748 |
| <i>atf1</i>        | 0.76339746  | 0.850402544 |
| <i>seb1</i>        | 1.312382603 | 0.722538992 |
| <i>red1</i>        | 1.135230283 | 1           |
| <i>mmi1</i>        | 0.924895086 | 0.844050436 |
| <i>air1</i>        | 1.047961649 | 1.027582095 |
| <i>pcr1</i>        | 1           | 0.508359146 |
| <i>rrp6</i>        | 1.142199137 | 1           |
| <i>cid14</i>       | 1           | 1.479324985 |
| <i>ago1</i>        | 1.041339871 | 1.155622389 |
| <i>chp1</i>        | 0.90897002  | 0.772592003 |
| <i>tas3</i>        | 0.771002973 | 1.123871657 |
| <i>dcr1</i>        | 0.758263135 | 1.00413756  |
| <i>rdp1</i>        | 1           | 1.205329488 |
| <i>grc3</i>        | 1           | 0.962710159 |
| <i>ipi1</i>        | 1.082023239 | 1.48851199  |
| <i>crb3</i>        | 0.782176827 | 1.173931179 |
| <i>rix1</i>        | 1           | 1.379565988 |
| <i>las1</i>        | 1           | 1.128689858 |
| <i>act1</i>        | 0.892686966 | 0.804520339 |

\* Reported values are average of all probes covering the coding region of the specified gene normalized to wildtype.
