# Supplementary material for: A Novel Epigenetic Silencing Pathway Involving the Highly Conserved 5’-3’ Exoribonuclease Dhp1/Rat1/Xrn2 in Schizosaccharomyces pombe
Source: PubMed Central journal article supplement (PMC4758730; doi:10.1371/journal.pgen.1005873), 2016-02-18
Supplement: pgen.1005873.s003.pdf [file pgen.1005873.s003.pdf]

S3 Table: Dhp1-FTP- and Din1-FTP-interacting proteins identified by LC-MS/MS\*

| <u>Name</u> | <u>Description</u>                                | Dhp1-FTP<br>Purification<br><u>Abundance**</u><br>(% of bait) | Din1-FTP<br>Purification<br><u>Abundance**</u><br>(% of bait) |
|-------------|---------------------------------------------------|---------------------------------------------------------------|---------------------------------------------------------------|
| Dhp1        | 5'-3' exoribonuclease                             | 100                                                           | 34.75                                                         |
| Din1        | Dhp1p-interacting protein                         | 50.47                                                         | 100                                                           |
| Mug161      | CwfJ family protein, splicing factor (predicted)  | 36.55                                                         | 6.25                                                          |
| Sum3        | Translation initiation RNA helicase (Moc2)        | 12.62                                                         | 4.1                                                           |
| Spt5        | Transcription elongation factor                   | 8.64                                                          | 5.63                                                          |
| Htb1        | Histone H2B                                       | 5.77                                                          | 0.70                                                          |
| Rpb2        | RNA polymerase II complex subunit                 | 5.65                                                          | 6.95                                                          |
| Rpb1        | RNA polymerase II large subunit                   | 5.43                                                          | 11.17                                                         |
| Hta1        | histone H2A alpha                                 | 4.57                                                          | 0.062                                                         |
| Rpb7        | DNA-directed RNA polymerase complex II subunit    | 4.51                                                          | 9.76                                                          |
| Rpb5        | DNA-directed RNA polymerase I, II and III subunit | 4.14                                                          | 3.95                                                          |
| Srp2        | mRNA export factor                                | 3.78                                                          | 0.55                                                          |
| Rpb9        | DNA-directed RNA polymerase II complex subunit    | 2.46                                                          | 2.11                                                          |
| Mlo3        | RNA binding protein Mlo3                          | 1.23                                                          | 0.05                                                          |
| Mmi1        | YTH family RNA binding protein                    | 0.50                                                          | 0.014                                                         |
| → Rrp6      | Exosome 3'-5' exoribonuclease subunit             | 0.042                                                         | 0                                                             |
| → Rik1      | Silencing Protein – ClrC subunit                  | 0.017                                                         | 0                                                             |

\*All proteins listed were not detected in the purification of the untagged control strain

\*\*Abundance values for each identified protein are normalized to the bait values
