# Supplementary material for: A Novel Epigenetic Silencing Pathway Involving the Highly Conserved 5’-3’ Exoribonuclease Dhp1/Rat1/Xrn2 in Schizosaccharomyces pombe
Source: PubMed Central journal article supplement (PMC4758730; doi:10.1371/journal.pgen.1005873), 2016-02-18
Supplement: pgen.1005873.s004.pdf [file pgen.1005873.s004.pdf]

S4 Table: List of oligonucleotides used in this study (1 of 3)

| Primer         | Sequence                    | Purpose                                                                             |
|----------------|-----------------------------|-------------------------------------------------------------------------------------|
| Rat1 FW 1      | CGGAAAGATGGCACATGG          | <i>dhp1</i> genotyping                                                              |
| Rat1 RV 3      | ATGTTTCGTTGCTTGCTGTGC       | <i>dhp1</i> genotyping                                                              |
| Dhp1-1 FW 1    | CAACCCTTCAAGCCTTACGA        | <i>dhp1-1&gt;&gt;ura4</i> genotyping, tagging<br><i>dhp1/dhp1-1</i>                 |
| Ura 5' RV 1    | TAGCCAGTGGGATTTGTAGC        | <i>dhp1-1&gt;&gt;ura4</i> genotyping                                                |
| Din1 UP F      | TCCAACCTGCATTACGTTG         | <i>din1</i> genotyping, tagging <i>din1</i>                                         |
| Din1 RV 1      | CGACAGGATCAGCGTTTCG         | <i>din1</i> genotyping                                                              |
| Rrp6 3' FW     | GACCTCTCTATAGTTGCCTG        | <i>rrp6</i> genotyping                                                              |
| Rrp6 3' RV     | TACTTAGCGTTTCCTCGCAG        | <i>rrp6</i> genotyping                                                              |
| Ago1_frw_check | ATGCGGTAATTTAAGAAAAGC       | <i>ago1</i> Δ genotyping                                                            |
| Ago1_rev_check | TCTGTATTTCTATATTGGCG        | <i>ago1</i> Δ genotyping                                                            |
| Ago1 Inside F  |                             | <i>ago1</i> genotyping                                                              |
| Ago1 Inside R  |                             | <i>ago1</i> genotyping                                                              |
| Clr4 UP        | TTGCTCTGAAATTGAACACATCGAC   | <i>clr4</i> genotyping                                                              |
| Clr4 DOWN      | CCGAGTCGGAGTTACTTCCCTTTAGTC | <i>clr4</i> genotyping                                                              |
| Clr4 RV 3      | CTTCCTGATATAGCACTTCCC       | <i>clr4</i> Δ genotyping                                                            |
| Dcr1 FW 1      | CCTATACTGATGGACATGGG        | <i>dcr1</i> Δ genotyping, amplify <i>dcr1</i> Δ::kanMX cassette                     |
| Dcr1 RV 2      | TTGCTGGAATACGGTTGCAG        | <i>dcr1</i> Δ genotyping                                                            |
| Swi6 UP        | GTGATGCTAGCCATTCTGTAC       | <i>swi6</i> genotyping                                                              |
| Swi6 DOWN      | AGAGTCGCTTTATGAGAAGC        | <i>swi6</i> genotyping                                                              |
| Swi6 RV 3      | CTGATGTCTTCATGTGTTGC        | <i>swi6</i> Δ genotyping                                                            |
| Clr3 RV 2      | CACGTGCTAACCATTACACC        | <i>clr3</i> genotyping                                                              |
| Epe1 RV 2      | GTGTGTTGTAGTATCCGGCT        | <i>epe1</i> Δ genotyping                                                            |
| Rhn1 RV 2      | CTGCACAACACATGGATGCG        | <i>rhn1</i> Δ genotyping                                                            |
| Sir2 RV 3      | GGTTGTGGTTTAGGTTCTCG        | <i>sir2</i> genotyping                                                              |
| Kan2           | ATCATTGGCAACGCTACCTT        | <i>KanMX6</i> genotyping (5' RV)                                                    |
| Kan3           | GCGCAATCACGAATGAATAA        | <i>KanMX6</i> genotyping (3' FW)                                                    |
| Nat2           | GGTGTCGGTGGTGAAGGACC        | <i>NatN2</i> genotyping (5' RV)                                                     |
| Nat3           | TGCCCTGCCCTAATCTCGA         | <i>NatN2</i> genotyping (3' RV)                                                     |
| MT1            | AGAAGAGAGAGTAGTTGAAG        | Mating-type genotyping                                                              |
| MP             | ACGGTAGTCATCGGTCTTCC        | Mating-type genotyping                                                              |
| MM             | TACGTTCACTAGACGTAGTG        | Mating-type genotyping                                                              |
| Ura4 DS/E #1   | GAGGGGATGAAAATCCCAT         | <i>DS/E</i> genotyping, <i>ura4</i> <sup>+</sup> versus <i>DS/E</i> competitive PCR |
| Ura4 DS/E #2   | TTCGACAACAGGATTACGACC       | <i>DS/E</i> genotyping, <i>ura4</i> <sup>+</sup> versus <i>DS/E</i> competitive PCR |
| Ade6 #1        | TGCGATGCACCTGACCAGGAAAGT    | <i>DN/N</i> genotyping, <i>ade6</i> <sup>+</sup> versus <i>DN/N</i> competitive PCR |
| Ade6 #2        | AGAGTTGGGTGTTGATTTGCTGA     | <i>DN/N</i> genotyping, <i>ade6</i> <sup>+</sup> versus <i>DN/N</i> competitive PCR |
| JPO4           | CGTGAGTATACAAACAATACTAGG    | <i>otr::ura4</i> genotyping                                                         |
| JPO17          | CTACTCTTCTCGATGATCCTGTAA    | <i>otr::ura4</i> genotyping                                                         |
| Ade6 3' FW 1   | GCGGACCATAGACATAACTG        | <i>KΔ::ade6</i> <sup>+</sup> genotyping                                             |
| K RV 2         | GGTTTGTGTTAGCGCACTTTG       | <i>KΔ::ade6</i> <sup>+</sup> genotyping                                             |

S4 Table: List of oligonucleotides used in this study (2 of 3)

| Primer        | Sequence                                         | Purpose                                          |
|---------------|--------------------------------------------------|--------------------------------------------------|
| Kan_Fwd       | CGGATCCCCGGGTAAATTA                              | Amplify <i>KanMX6</i> Cassette                   |
| Kan_Rev       | GAATTCGAGCTCGTTTAAAC                             | Amplify <i>KanMX6</i> Cassette                   |
| Nat-F2        | CGGATCCCCGGGTAAATTA                              | Amplify <i>NatN2</i> Cassette                    |
| Nat2-S2       | ATCGATGAATTCGAGCTCG                              | Amplify <i>NatN2</i> Cassette                    |
| Ade6 Full FW  | TATGCCTTTTCGATGCCAATTG                           | Amplify <i>ade6+</i> Cassette                    |
| Ade6 Full RV  | GAACATGGTCAACGGGG                                | Amplify <i>ade6+</i> Cassette                    |
| Clr3 FW 1     | CGTCATTCACTCGTGTTTGT                             | Amplify <i>clr3Δ::kanMX</i> Cassette             |
| Clr3 RV 1     | TGGATGAGGGATTTCCCTCA                             | Amplify <i>clr3Δ::kanMX</i> Cassette             |
| Clr4 F1       | ACACAGATGGGTTAGACTCC                             | Amplify <i>clr4Δ::kanMX</i> Cassette             |
| Clr4 R1       | CAGGCAGATCCTTCCCTTGA                             | Amplify <i>clr4Δ::kanMX</i> Cassette             |
| Dcr1 RV 1     | GGAAGCTCAATCAATCGACG                             | Amplify <i>dcr1Δ::kanMX</i> Cassette             |
| Epe1 FW 1     | GCCGAATATAGCCTGCTTCA                             | Amplify <i>epe1Δ::kanMX</i> Cassette             |
| Epe1 RV 1     | CGAGTCAAAGTGGATTGATGC                            | Amplify <i>epe1Δ::kanMX</i> Cassette             |
| K FW          | CCGAATACCACGAAGTTATTG                            | Amplify K region fragment 1 ( <i>KΔ::ade6+</i> ) |
| Ade6-KΔ R     | CAATTGGCATCGAAAGGCATAGTTCAG<br>ACTGATCTCGCAATT   | Amplify K region fragment 1 ( <i>KΔ::ade6+</i> ) |
| Ade6-KΔ F     | AAACCCCGTTGACCATGTTTCGCTTTCC<br>TCTCAGCATTGAG    | Amplify K region fragment 3 ( <i>KΔ::ade6+</i> ) |
| K RV          | GATCGCCAAAGTTGTATTGC                             | Amplify K region fragment 3 ( <i>KΔ::ade6+</i> ) |
| Rhn1 FW 1     | TCGTTTGGCGATGCTAACAGC                            | Amplify <i>rhn1Δ::kanMX</i> cassette             |
| Rhn1 RV 1     | GCATATCCTCTACTTCTGCC                             | Amplify <i>rhn1Δ::kanMX</i> cassette             |
| Swi6 5' FW    | CTTGAGAGACTCAGCATTGC                             | Amplify <i>swi6Δ::NATN2</i> cassette             |
| Swi6 RV 1     | CATGAAGAGCAGTGCATGC                              | Amplify <i>swi6Δ::NATN2</i> cassette             |
| Nat_Rat1_R    | TTAATTAACCCGGGGATCCGATAGTAGC<br>CATTCCCTGTTATTAT | <i>dhp1</i> tagging                              |
| Nat_Rat1_F    | CGAGTCGAATTCATCGATGCGGGTTTG<br>GGATATTGGAG       | <i>dhp1</i> tagging                              |
| Rat1_dw_R     | GGGGACATTCTACTGTTGTAG                            | <i>dhp1</i> tagging                              |
| Kan_Din_R     | TTAATTAACCCGGGGATCCGAATTATTT<br>GTCGTAAAACAAG    | <i>din1</i> tagging                              |
| Kan_Din_F     | CGAGCTCGAATTCATCGATAGTAGGGT<br>TATACACTAGATGT    | <i>din1</i> tagging                              |
| Din DOWN R    | CAACCACGCCCTCCATATAC                             | <i>din1</i> tagging                              |
| Sir2 FW 1     | ACGCATTCCAGTTCTCATGG                             | <i>sir2</i> deletion                             |
| Sir2 FW 2     | CCTCCTACTACTCCTCAGAT                             | <i>sir2</i> tagging                              |
| NAT Sir2 FW   | CGAGCTCGAATTCATCGATGGACTGAT<br>CGATCTATCGAA      | <i>sir2</i> deletion/tagging                     |
| NAT Sir2 RV 1 | TTAATTAACCCGGGGATCCGATAGACTT<br>GCGCGTACCCTT     | <i>sir2</i> deletion                             |
| NAT Sir2 RV 2 | TTAATTAACCCGGGGATCCGACAATA<br>CCGTTTGTGTGC       | <i>sir2</i> tagging                              |
| Sir2 RV 1     | ACCTTTTGGCATGCTCGATG                             | <i>sir2</i> deletion/tagging                     |

S4 Table: List of oligonucleotides used in this study (3 of 3)

| Primer                  | Sequence                                   | Purpose                                                 |
|-------------------------|--------------------------------------------|---------------------------------------------------------|
| q-Actin F               | GGTTTCGCTGGAGATGATG                        | qRT-PCR: <i>act1+</i> (Endogenous Control)              |
| q-Actin R               | ATACCACGCTTGCTTTGAG                        | qRT-PCR: <i>act1+</i> (Endogenous Control )             |
| q-Leu1 F1               | ATTGCTCGTTTGGCTGCTTG                       | qChIP: <i>leu1+</i> (Endogenous Control)                |
| q-Leu1 R1               | TACAGTCTTGCGCCAAAGAC                       | qChIP: <i>leu1+</i> (Endogenous Control)                |
| q-Ade6 F                | ATGCTTATCCTACAACCTGAGACC                   | qPCR: <i>ade6+</i>                                      |
| q-Ade6 R                | TGAATTGAGAAGGGAAGACGAG                     | qPCR: <i>ade6+</i>                                      |
| q-Cen(dg) F             | AATTGTGGTGGTGTGGTAATAC                     | qPCR: Centromere ( <i>dg</i> )                          |
| q-Cen(dg) R             | GGGTTTCATCGTTTCCATTCAG                     | qPCR: Centromere ( <i>dg</i> )                          |
| q-Mat F3                | AGTAATTCTATGTACCCCGTGC                     | qPCR: Mating-type locus ( <i>cenH</i> )                 |
| q-Mat R3                | CGTCGTCACCAATCGATCTT                       | qPCR: Mating-type locus ( <i>cenH</i> )                 |
| qUra4 5' F1             | CTAGATTCTAGGATGCGTATTGG                    | qPCR: Spreading Assay "A"                               |
| qUra4 5' R1             | CAGTTTGCTCATGGGTACAAC                      | qPCR: Spreading Assay "A"                               |
| Ura4 Stul F1            | AATTGCCATACAGTGCCAGG                       | qPCR: Spreading Assay "B"                               |
| q-CenH <i>ade6</i> FW 2 | GGTTAAATTGTGGTGGTGTGG                      | qPCR: Spreading Assay "B"                               |
| q-CenH <i>ade6</i> FW 1 | TGACAAAGGTGCCGAATCAAC                      | qPCR: Spreading Assay "C"                               |
| q-CenH <i>ade6</i> RV 1 | TTGCAACAGGCGGCCAAGC                        | qPCR: Spreading Assay "C"                               |
| qUra4 3' F1             | CTGGCAATGTTACGAGGAATC                      | qPCR: Spreading Assay "D"                               |
| qUra4 3' R1             | TTCAGAAGAACATTACTIONCGTGC                  | qPCR: Spreading Assay "D"                               |
| Dhp1 D55A FW            | GACAACTTGTATTTGGCCATGAATGG<br>TATTGTTTCATC | <i>dhp1</i> mutagenesis                                 |
| Dhp1 D55A RV            | GATGAACAATACCATTCATGGCCAAA<br>TACAAGTTGTC  | <i>dhp1</i> mutagenesis                                 |
| Dhp1 E207Q FW           | GTTCCCTGGTGAAGGTCAACATAAGAT<br>CATGGAATT   | <i>dhp1</i> mutagenesis                                 |
| Dhp1 E207Q RV           | AATTCCATGATCTTATGTTGACCTTCA<br>CCAGGAAC    | <i>dhp1</i> mutagenesis                                 |
| Pst1- Dhp1 FW           | ATCGCTGCAGCGCTACCATTGATGA<br>GTCTG         | Clone fragment containing <i>dhp1+</i> gene into pREP41 |
| BamHI-Dhp1 RV           | TCTAGGATCCCTCGATTGATGGATCT<br>TATGCATG     | Clone fragment containing <i>dhp1+</i> gene into pREP41 |
